# Supplementary material
Source: bioRxiv or medRxiv preprint supplement (https://medrxiv.org/highwire/filestream/96405/field_highwire_adjunct_files/0/2020.09.09.20191593-1.pdf)
Supplement: Supplementary file [file 2020.09.09.20191593-1.pdf]

## Supplemental Figure S1

Running Title: COVID-19Predict – Predicting Pandemic Trends.

Jürgen Bosch<sup>1,2</sup>, Austin Wilson<sup>3</sup>, Karthik O’Neil<sup>4</sup>, Peter A. Zimmerman<sup>5,6</sup>

<sup>1</sup> Division of Pediatric Pulmonology and Allergy/Immunology, Case Western Reserve University, Cleveland, OH, United States

<sup>2</sup> InterRayBio, LLC, Baltimore, MD, United States

<sup>3</sup> Department of Computer Science, Case Western Reserve University, Cleveland, OH, United States

<sup>4</sup> Andrews Osborne Academy (AOA), Willoughby, OH, United States

<sup>5</sup> The Center for Global Health and Diseases, Pathology Department, Case Western Reserve University, Cleveland, OH, United States

<sup>6</sup> Masters of Public Health Program, Department of Population Quantitative Health Sciences, Case Western Reserve University, Cleveland, OH, United States

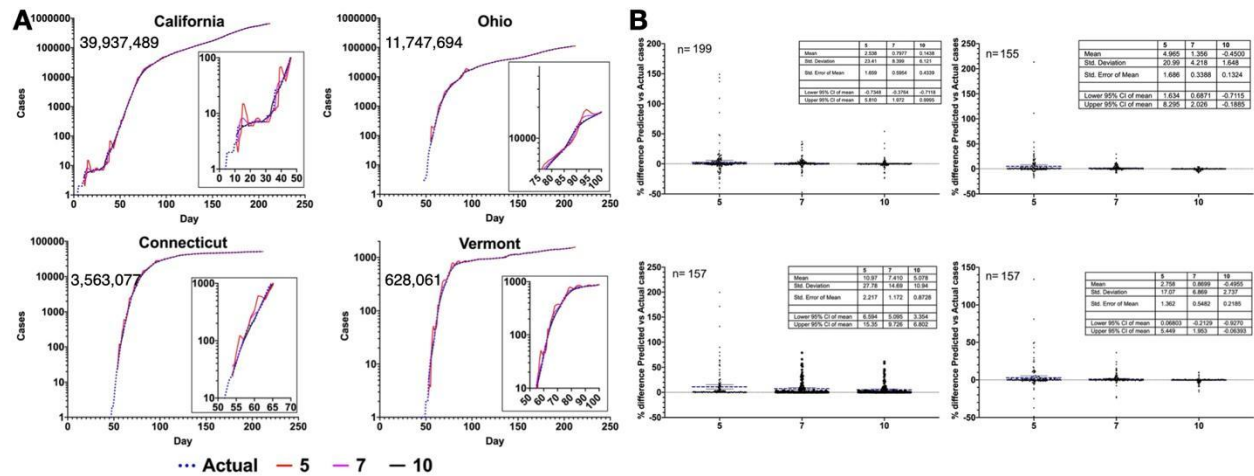

**Figure S1: Sensitivity analysis of our short-term prediction using four states as an example over the course of the pandemic.** A) Using historical data and our five, seven and ten day prediction algorithm the predictions are plotted for each curve 7 days into the future. The inset shows a zoomed in region to be able to distinguish the three prediction lines from the actual cases. The actual cases are shown in each graph as dotted blue line, while the predictions using 5 day

data (red), 7 day data (purple) and 10 day data (black). In each of the graphs the population of the state is given. B) Statistical analysis of our predictions during the course of the pandemic for each of these states. The graphs show for every data point by what percentage our prediction was inaccurate. Note that the mean error becomes smaller when more data points are used for the prediction. The number of data points over which a prediction was made is denoted in the upper left corner of each graph.
